# Supplementary material
Source: publisher site journal article supplement (https://www.spandidos-publications.com/6996/downloadSupplementary)
Supplement: Supplementary file 1 [file downloadSupplementary]

## Sheet: Table SIII
Table SIII. The QC of the DNA library and NGS data for the WES samples. QC, quality control; NGS, next-generation sequencing; WES, whole-exome sequencing.
Sample no.	Input DNA, ng	Library concentration, ng/µl	Raw									After QC										Reference alignment
			total_reads	total_bases	q20_bases	q30_bases	q20_rate	q30_rate	read1_mean_length	read2_mean_length	gc_content	total_reads	total_bases	q20_bases	q30_bases	q20_rate	q30_rate	read1_mean_length	read2_mean_length	gc_content	insert_size_peak	MAPPING_RATIO	MEAN_COVERAGE	ON_TARGET_RATIO	DUPLICATE_RATIO	FOLD_80_BASE_PENALTY	PCT_TARGET_BASES_1X	PCT_TARGET_BASES_2X	PCT_TARGET_BASES_10X
A101	50	62.9	88190476	13228571400	12793505346	12121388349	0.967112	0.916304	150	150	0.47635	87242456	12577695197	12231317340	11611717172	0.972461	0.923199	144	144	0.473951	188	0.999624	167.311	0.597549	0.238985	1.99841	0.958379	0.956658	0.950554
A102	50	76.1	90141044	13521156600	13003807363	12234630107	0.961738	0.904851	150	150	0.474926	89121322	12884386878	12474739360	11762319721	0.968206	0.912913	144	144	0.471993	186	0.999739	170.298	0.59374	0.235776	1.99773	0.958115	0.956464	0.950773
A45	50	60.7	130727634	19609145100	19073903102	18294056546	0.972704	0.932935	150	150	0.54137	129572548	17994221582	17655129502	17000879892	0.981156	0.944797	138	138	0.54107	150	0.999654	266.81	0.666069	0.257947	2.33025	0.956853	0.955316	0.951409
A48	50	78.6	88968806	13345320900	12974009009	12349656924	0.972177	0.925392	150	150	0.50986	87879968	12194533186	11944204233	11420110215	0.979472	0.936494	138	138	0.508122	150	0.99954	185.412	0.554329	0.258132	1.33536	0.959396	0.958066	0.953761
A49	50	73	103855084	15578262600	15193094914	14569951594	0.975275	0.935274	150	150	0.533014	102967720	14452144699	14177149257	13641891973	0.980972	0.943935	140	140	0.5338	150	0.999733	211.041	0.655969	0.27658	2.21934	0.956838	0.955314	0.950956
A50	50	64.3	95320910	14298136500	13950042504	13385791054	0.975655	0.936191	150	150	0.532364	94551728	13224320609	12981590203	12502675244	0.981645	0.94543	139	139	0.531654	152	0.999766	194.143	0.659475	0.250426	2.26715	0.956702	0.955134	0.950619
A54	50	67.8	105092412	15763861800	15238307490	14442141765	0.966661	0.916155	150	150	0.474291	103977272	14856740483	14456196604	13735193123	0.97304	0.924509	142	142	0.471218	171	0.999712	200.603	0.606544	0.234576	2.06516	0.957843	0.95622	0.950798
A57	50	66.1	90238880	13535832000	13170202714	12524193493	0.972988	0.925262	150	150	0.505326	89642870	12663607731	12390632510	11820144705	0.978444	0.933395	141	141	0.504302	159	0.999675	166.922	0.480565	0.257063	1.34127	0.957355	0.956011	0.951996
A59	50	76.3	106107058	15916058700	15445062345	14663401654	0.970407	0.921296	150	150	0.507876	104499524	15013504322	14668846514	13970377249	0.977043	0.930521	143	143	0.50688	173	0.999467	212.629	0.51634	0.250732	1.39994	0.960383	0.959101	0.955305
A62	50	56.5	81937910	12290686500	11745306509	11020341852	0.955627	0.896642	150	150	0.501061	80801904	10951486707	10594974066	9998227249	0.967446	0.912956	135	135	0.497815	151	0.999564	152.51	0.62557	0.269468	2.05201	0.955066	0.953125	0.943823
A65	50	73.9	94589890	14188483500	13617847619	12764235916	0.959782	0.899619	150	150	0.495015	93518646	13392604880	12945548305	12169736981	0.966619	0.908691	143	143	0.492373	174	0.999686	181.417	0.608504	0.252061	1.83099	0.958093	0.956477	0.951549
A67	50	58.7	90174818	13526222700	12995213378	12270313686	0.960742	0.90715	150	150	0.475096	87371274	12897475782	12517232093	11856746084	0.970518	0.919307	147	147	0.474489	225	0.998952	146.647	0.414539	0.228934	1.32749	0.961303	0.959797	0.953805
A72	50	69.9	124290556	18643583400	18000466230	17019765595	0.965505	0.912902	150	150	0.505888	123017088	17169777749	16708146323	15860154567	0.973114	0.923725	139	139	0.503868	150	0.999641	253.724	0.663813	0.269294	2.4634	0.956567	0.9547	0.947091
A73	50	72.5	88691516	13303727400	12868419150	12204447746	0.967279	0.917371	150	150	0.490753	87635944	12422329845	12095597354	11503540179	0.973698	0.926037	141	141	0.48813	163	0.999575	169.507	0.612961	0.255487	1.87869	0.957968	0.956342	0.951018
A75	50	70.4	111987420	16798113000	16399606835	15793373679	0.976277	0.940187	150	150	0.498847	110763742	15934825513	15645230385	15097172602	0.981826	0.947433	143	143	0.4975	181	0.999756	212.449	0.598903	0.231369	1.84578	0.958863	0.957379	0.953428
A76	50	54.7	102714980	15407247000	14868851074	14064941716	0.965056	0.912878	150	150	0.495628	101024836	14624079864	14214893969	13485359957	0.97202	0.922134	144	144	0.494128	185	0.999339	182.027	0.453798	0.219365	1.41743	0.960762	0.959407	0.955613
A85	50	54.9	92649256	13897388400	13421709516	12700826431	0.965772	0.9139	150	150	0.486252	91647384	13096666507	12733996755	12082338214	0.972308	0.922551	142	142	0.484101	168	0.999627	177.713	0.609548	0.250724	1.88369	0.957804	0.956283	0.951157
A87	50	68.1	94139850	14120977500	13703098991	13020498565	0.970407	0.922068	150	150	0.508195	92894600	13175447695	12881472993	12284519607	0.977688	0.93238	141	141	0.506951	166	0.99951	192.958	0.53394	0.245201	1.33207	0.960148	0.95885	0.954589
A88	50	57.5	86665482	12999822300	12512818260	11797123053	0.962538	0.907483	150	150	0.479865	85599356	11990880532	11637523778	11012909850	0.970531	0.91844	140	140	0.476332	150	0.999523	168.059	0.629593	0.279773	2.3407	0.956473	0.954581	0.944356
A89	50	64.1	84667552	12700132800	12255481016	11642879223	0.964988	0.916753	150	150	0.505898	83778650	11557610007	11264362396	10742286248	0.974627	0.929456	137	137	0.502799	151	0.999713	163.481	0.635402	0.221782	1.96982	0.956422	0.954868	0.949484
A92	50	76.9	38237992	5735698800	5530924061	5223589730	0.964298	0.910715	150	150	0.461912	37588584	5436339645	5281437859	5003094711	0.971506	0.920306	144	144	0.459555	189	0.999336	56.8846	0.470043	0.214519	2.11301	0.95027	0.944661	0.872288
A94	50	55.9	91486540	13722981000	13252232906	12549290018	0.965696	0.914473	150	150	0.471003	90417406	12746190141	12405493518	11787416727	0.973271	0.92478	140	140	0.46718	151	0.999687	177.604	0.625925	0.26108	2.48032	0.956664	0.954879	0.943241
A95	50	70.5	90020612	13503091800	13013124843	12242849383	0.963714	0.90667	150	150	0.475896	89143820	12751088243	12362376692	11661877190	0.969515	0.914579	143	143	0.472867	170	0.999627	173.868	0.612521	0.270325	2.06289	0.95812	0.95647	0.948778
A96	50	64	87973990	13196098500	12701688166	11946653714	0.962534	0.905317	150	150	0.464818	86976394	12374597687	11995383979	11316586775	0.969355	0.914501	142	142	0.460623	168	0.999602	173.621	0.630262	0.284332	2.55541	0.956782	0.954768	0.941472
A97	50	72	97271330	14590699500	14020421547	13157213268	0.960915	0.901753	150	150	0.49278	96216752	13909682529	13450978668	12652308686	0.967023	0.909604	144	144	0.490173	178	0.999617	185.362	0.598623	0.267596	2.11624	0.958275	0.956718	0.951255
B101	50	55.7	45509668	6826450200	6562292595	6159423922	0.961304	0.902288	150	150	0.475692	44997916	6440683877	6232743199	5866001609	0.967715	0.910773	143	143	0.472489	170	0.999702	87.4094	0.609643	0.220545	2.12956	0.956814	0.954711	0.933101
B102	50	71.8	46430568	6964585200	6700179701	6287309993	0.962036	0.902754	150	150	0.464611	45937670	6737210563	6514650943	6123819253	0.966966	0.908955	146	146	0.462904	190	0.999686	89.136	0.594323	0.229652	2.27535	0.956795	0.95472	0.929852
B45	50	59	45725700	6858855000	6692012695	6429763506	0.975675	0.93744	150	150	0.511265	45319834	6148556450	6046116204	5839684789	0.983339	0.949765	135	135	0.510997	133	0.999618	90.5154	0.6613	0.232824	2.11649	0.954748	0.952783	0.927302
B48	50	55.7	66544896	9981734400	9717451429	9240451589	0.973523	0.925736	150	150	0.503479	66120916	9416297617	9215180588	8787537702	0.978642	0.933226	142	142	0.502143	156	0.999772	140.961	0.545775	0.23049	1.37264	0.957999	0.956574	0.952236
B49	50	74.4	55480802	8322120300	8113033066	7787724750	0.974876	0.935786	150	150	0.525402	55016586	7540592578	7408693952	7144910058	0.982508	0.947526	137	137	0.524091	139	0.999774	110.792	0.66001	0.248319	2.35692	0.955315	0.953443	0.935756
B50	50	54.7	56867088	8530063200	8295703244	7942502038	0.972525	0.931119	150	150	0.515167	56339262	7759847787	7611864350	7321872805	0.98093	0.943559	137	137	0.514193	140	0.999724	112.642	0.652075	0.255806	2.05633	0.955577	0.953803	0.941962
B54	50	51.2	58383980	8757597000	8424664617	7911873226	0.961984	0.90343	150	150	0.451208	57824164	8337625184	8071202559	7596580502	0.968046	0.91112	144	144	0.447222	180	0.999689	112.556	0.606425	0.23791	3.28459	0.956038	0.953063	0.896813
B57	50	70.4	106163268	15924490200	15422853649	14624220426	0.968499	0.918348	150	150	0.4899	104117798	14868042856	14516406369	13814231465	0.97635	0.929122	142	142	0.488125	171	0.999338	211.735	0.5192	0.260039	1.36956	0.960072	0.958745	0.954029
B59	50	55.6	99717848	14957677200	14476836102	13735590032	0.967853	0.918297	150	150	0.492641	97258856	13712368381	13397569027	12766270714	0.977043	0.931004	140	140	0.490709	150	0.9992	201.437	0.535579	0.269204	1.37139	0.959554	0.958164	0.95393
B62	50	67.2	57384672	8607700800	8275979012	7806480729	0.961462	0.906918	150	150	0.515097	56760986	7700256135	7485114355	7099918412	0.97206	0.922037	135	135	0.511704	151	0.999696	113.054	0.659523	0.219699	2.32168	0.954915	0.953036	0.935531
B65	50	70	81659558	12248933700	11777129072	11046611217	0.961482	0.901843	150	150	0.468183	80836044	11646119918	11266762284	10594248455	0.967426	0.909681	144	144	0.464882	182	0.999678	156.372	0.603151	0.235532	2.20572	0.957924	0.956151	0.948465
B67	50	74.1	86814758	13022213700	12424722007	11709462537	0.954118	0.899191	150	150	0.492222	82454004	12035513361	11665798089	11048743663	0.969281	0.918012	145	145	0.49225	215	0.998717	142.685	0.432224	0.231595	1.35723	0.960635	0.959311	0.953884
B72	50	59.6	44440482	6666072300	6421758808	6040471720	0.96335	0.906152	150	150	0.449844	43969352	6308134091	6115047289	5767033992	0.969391	0.914222	143	143	0.446436	177	0.999514	88.005	0.626694	0.250475	3.25175	0.955518	0.951844	0.860437
B73	50	52.3	54831194	8224679100	7915873831	7432860756	0.962454	0.903727	150	150	0.471689	54229946	7973629969	7713097220	7253907048	0.967326	0.909737	147	147	0.469548	202	0.999761	104.057	0.586227	0.243831	2.037	0.957803	0.955949	0.944834
B75	50	54.9	47307036	7096055400	6829355038	6414021108	0.962416	0.903885	150	150	0.463055	46873940	6804558970	6587682076	6200242209	0.968128	0.911189	145	145	0.460545	179	0.999703	94.1652	0.621641	0.257821	2.41269	0.955219	0.952567	0.913383
B76	50	57	45913442	6887016300	6641986531	6277431041	0.964421	0.911488	150	150	0.481871	45033482	6610083690	6419752351	6082548110	0.971206	0.920192	146	146	0.480757	199	0.999255	78.8246	0.434761	0.2295	1.36981	0.960002	0.958213	0.949188
B85	50	71.8	70924678	10638701700	10236347940	9605569636	0.96218	0.902889	150	150	0.468551	70199168	10292291099	9952120187	9354413686	0.966949	0.908876	146	146	0.466692	204	0.999659	135.623	0.591931	0.237923	2.07898	0.957743	0.956051	0.947972
B87	50	56.8	82987020	12448053000	12113969405	11523492721	0.973162	0.925727	150	150	0.504517	82484276	11625616136	11379423828	10859665359	0.978823	0.934115	140	140	0.503413	156	0.999792	175.14	0.549244	0.238754	1.49115	0.957984	0.956763	0.95234
B88	50	76.5	52603294	7890494100	7590100213	7146998367	0.96193	0.905773	150	150	0.486524	51937508	7228708817	7013897918	6631223948	0.970284	0.917346	139	139	0.483489	160	0.999545	104.385	0.648671	0.255707	2.34962	0.955491	0.953415	0.925462
B89	50	72.8	50312166	7546824900	7240970383	6819623977	0.959472	0.903641	150	150	0.504749	49596768	6760472174	6559917669	6210921706	0.970334	0.918711	136	136	0.499966	150	0.99959	98.6607	0.655566	0.273537	2.61747	0.954454	0.952096	0.906622
B92	50	64.4	54878896	8231834400	7877628299	7412383091	0.956971	0.900453	150	150	0.468403	52748038	7802188963	7555829399	7135023166	0.968424	0.91449	147	147	0.468197	213	0.998895	83.8053	0.482508	0.229491	1.46334	0.95275	0.9485	0.93386
B94	50	68.8	55537618	8330642700	8058401080	7664979355	0.96732	0.920095	150	150	0.499157	54773912	7754369073	7560995302	7212464453	0.975063	0.930116	141	141	0.496829	181	0.999658	109.547	0.634602	0.225399	2.09953	0.95654	0.954871	0.944383
B95	50	66.3	68080486	10212072900	9812724523	9212503753	0.960894	0.902119	150	150	0.478658	67379378	9676319930	9365828909	8816161424	0.967912	0.911107	143	143	0.476037	182	0.999608	133.927	0.62174	0.251021	2.101	0.95786	0.955898	0.9468
B96	50	71.9	64770144	9715521600	9331809132	8755292989	0.960505	0.901166	150	150	0.492782	63999516	9138199387	8838827536	8316971787	0.96724	0.910132	142	142	0.489881	171	0.999698	126.079	0.619772	0.248623	2.27653	0.956828	0.954997	0.944158
B97	50	71.9	49823256	7473488400	7217590888	6813280546	0.965759	0.91166	150	150	0.48417	49389600	7091891293	6892008646	6522109437	0.971815	0.919657	143	143	0.482023	184	0.999819	96.2967	0.609956	0.230926	2.0025	0.957065	0.955121	0.942032
